## **Therapeutic vulnerability to ATR inhibition in concurrent *NF1* and *ATRX*-deficient high-grade solid tumors**

Ming Yuan<sup>1</sup>, Charles G. Eberhart<sup>1</sup>, Christine A. Pratilas<sup>2,3</sup>, Jaishri O. Blakeley<sup>2,4</sup>, Christine Davis<sup>1</sup>, Marija Stojanova<sup>5</sup>, Karlyne Reilly<sup>7</sup>, Alan K. Meeker<sup>1,2</sup>, Christopher M. Heaphy<sup>1,2,5,6</sup>, Fausto J. Rodriguez<sup>1,2,8</sup>

Departments of Pathology<sup>1</sup>, Oncology<sup>2</sup>, Pediatrics<sup>3</sup>, and Neurology<sup>4</sup> Johns Hopkins University School of Medicine, Baltimore, MD

Departments of Medicine<sup>5</sup> and Pathology and Laboratory Medicine<sup>6</sup>, Boston University School of Medicine and Boston Medical Center, Boston, MA

National Cancer Institute<sup>7</sup>, Bethesda, MD

Department of Pathology and Laboratory Medicine<sup>8</sup>, David Geffen School of Medicine, University of California, Los Angeles, Los Angeles, CA

### **Address correspondence to:**

Fausto J. Rodriguez MD

Department of Pathology & Laboratory Medicine

David Geffen School of Medicine

University of California Los Angeles (UCLA)

10833 Le Conte Avenue, CHS Bldg., Suite 18-170B

Los Angeles, CA 90095

FJRodriguez@mednet.ucla.edu

or

Christopher M. Heaphy PhD

Department of Medicine

Boston University School of Medicine

650 Albany Street, EBRC 444

Boston, MA 02118

heaphyc@bu.edu

## Abstract

Subsets of Neurofibromatosis Type 1 (NF1)-associated solid tumors have been shown to display high frequencies of ATRX mutations and presence of alternative lengthening of telomeres (ALT). In addition, a potential biologic vulnerability of ALT-positive cancer cells is ATR inhibition, a regulator of homologous recombination. We studied the phenotype of combined NF1 and ATRX deficiency in malignant solid tumors. For these experiments, cell lines derived from NF1-deficient sporadic glioblastomas (U251, SF188), a NF1-associated ATRX mutant glioblastoma cell line (JHH-NF1-GBM1), a NF1-derived sarcoma cell line (JHH-CRC65), and two NF1-deficient MPNST cell lines (ST88-14, NF90.8) were utilized. Cancer cells were treated with ATR inhibitors (AZD6738 and VE-822), in vitro, with or without a MEK inhibitor (AZD6244, selumetinib) or temozolomide. In contrast to the glioma cell line SF188, combined ATRX knockout (KO) and TERC KO led to ALT-like properties and sensitized U251 glioma cells to ATR inhibition (AZD6738 and VE-822) in vitro and in vivo. In addition, ATR inhibitors sensitized U251 cells to temozolomide, but not MEK inhibition (AZD6244), irrespective of ATRX level manipulation; whereas, the JHH-NF1-GBM1 cell line (ATRX loss/ALT-positive) demonstrated sensitivity to ATR inhibition (AZD6738), but not temozolomide. Similar effects were noted using the MPNST cell line NF90.8 after combined ATRX knockdown and TERC KO; however, not in the MPNST cell line ST88-14. Taken together, our study supports the feasibility of targeting the ATR pathway in subsets of NF1-deficient and associated tumors. Tumors with pre-existing ALT, or that subsequently develop ALT after ATRX downregulation, are particularly vulnerable to this therapeutic approach.

**Key Words:** ATR, ATRX, alternative lengthening of telomeres, glioma, neurofibromatosis, MPNST

## Introduction

Neurofibromatosis type 1 (NF1) is an inherited tumor predisposition syndrome, and individuals affected with NF1 are prone to develop tumors of the central nervous system (CNS) and peripheral nervous system. Rarely, these individuals may develop other solid neuroendocrine and mesenchymal tumors, some of which may behave in a malignant fashion (1). The most common primary CNS tumors in these patients are pilocytic astrocytomas (PA) which have a predilection for the optic pathways, especially in children. It is also known that the full spectrum of glial neoplasia may develop in these patients, including low- and high-grade astrocytomas (2). Specific drivers of sporadic high-grade astrocytomas have been elucidated in the past years through genome-wide sequencing (3), and similar techniques have been applied to study NF1-associated astrocytomas, identifying genetic alterations in *TP53*, *CDKN2A*, and *ATRX* (4).

Telomeres are composed of a repetitive DNA sequence (TTAGGG) bound by a shelterin protein complex that protects the ends of linear chromosomes to maintain genomic integrity. However, in normal cells, telomeres progressively shorten with each cell division. Critically short telomeres can lead to breakage-fusion-bridge cycles that may lead to the accumulation of catastrophic global genomic damage or cellular senescence. To ensure unlimited replication potential, cancer cells employ two major, largely mutually exclusive, mechanisms of telomere maintenance. The predominant mechanism is expression of the reverse transcriptase, telomerase, which is encoded by an RNA component (*TERC*) and the rate limiting catalytic subunit (*TERT*). In cancer, telomerase up-regulation is frequently mediated through activating mutations (5), amplifications, structural variants, and promoter methylation (6) in *TERT*. However, a subset of cancers maintain their telomere lengths independent of telomerase, using the Alternative Lengthening of Telomeres (ALT) (7). ALT results from an aberrant homologous recombination-based process mediated by homology-directed repair that leads to the presence of unique molecular features in ALT-positive cancers, including the presence of ultra-long

telomeres, dramatic cell-to-cell telomere heterogeneity (assayable in cell and tissue samples via telomere-specific FISH), and the presence of single stranded extrachromosomal circles containing the C-rich telomere repeat sequence (C-circles; assayable by rolling circle amplification). Variations in telomere length have emerged as a prognostic factor in a variety of tumor types (8,9). Our group has reported a high frequency of ALT in high-grade astrocytomas developing in individuals with NF1-syndrome, as well as a small subset of MPNST, although usually not in their benign counterparts (10).

Prior studies have linked alterations in the *alpha thalassemia/mental retardation syndrome X-linked (ATRX)* or *death domain-associated protein (DAXX)* genes with ALT in a subset of cancers (11). Loss of ATRX function leads to abnormal methylation and gene expression patterns, as well as chromosome mis-segregation. In the nucleus, ATRX cooperates with the molecular chaperone DAXX to incorporate the H3.3 histone variant in heterochromatic regions, including at telomeres. *ATRX* mutations and ALT are associated with specific molecular subgroups of sporadic brain tumors (4,10). In NF1-associated tumors, particularly astrocytomas, *ATRX* mutations and ALT are associated with specific tumor groups such as the recently recognized WHO tumor type high-grade astrocytoma with piloid features (12,13).

Prior studies have documented that ATRX loss and ALT may represent a therapeutic vulnerability (14,15) and that these cells are sensitive to ATR inhibition in sporadic tumorigenesis (16). Additionally, ATRX inactivation promotes DNA damage and cellular death, which may synergize with specific therapeutic approaches. Thus, we hypothesized that the *ATRX* mutations and telomere alterations that occur in distinctive subsets of NF1-associated tumors, particularly those with an aggressive phenotype, represent a potential vulnerability that can be therapeutically targeted.

## Methods

### Cell Lines

Human tumor specimens were collected at Johns Hopkins Hospital with local Institutional Review Board approval, and written informed consent was obtained from patients or their parents. Tissues were minced and digested with either papain dissociation system Grand Island, New York), then filtered through a 70- $\mu$ m Falcon cell strainer (ThermoFisher Scientific). JHH-NF1-GBM1 was grown in DMEM/F12 containing 1x B27 supplement (ThermoFisher Scientific), 20ng/ml EGF (PeproTech), 20ng/ml FGF-b (PeproTech) and 5 $\mu$ g/ml Heparin (Millipore SIGMA). Conditionally reprogramming culture (CRC) cell lines (JHH-NF1-PA1 and JHH-CRC65) were grown under the conditions described previously (17). 50% F medium (25% F-12, 75% DMEM supplied with 10% FBS and 5 $\mu$ g/ml Insulin), 50% 3T3 condition medium is supplied with 25 ng/ml Hydrocortisone (Millipore Sigma), 0.1 nmol/l Cholera toxin (Millipore SIGMA), 10 ng/ml EGF (PeproTech) and 5  $\mu$ M ROCK inhibitor Y-27632 (Selleckchem). U251 was purchased from the American Type Culture Collection (ATCC) and SF188 was kindly provided by Dr. Chris Jones (Institute of Cancer Research, Sutton, UK). U251 ATRX<sup>-M</sup>, U251 ATRX<sup>-2.02</sup>, SF188 ATRX<sup>-F</sup> and SF188 ATRX<sup>-N</sup> were utilized as previously described (18). U251 and SF188 cells were grown in DMEM/F12 supplemented with 10% FBS (ThermoFisher Scientific). NF90.8 and ST88-14 were maintained in RPMI supplemented with 10% FBS (ThermoFisher Scientific). Murine glioma cell lines 130G#3, 158D#8, 1491-9 and 1861-10 were maintained in DMEM supplemented with 10% FBS (ThermoFisher Scientific) (19). All cells were cultured in a humidified 37°C incubator with 5% CO<sub>2</sub>. Human Schwann cells were purchased from ScienCell and maintained in Schwann cell media. Cell lines were routinely tested for mycoplasma and human cell line identities were confirmed by short tandem repeat (STR) profiling (Johns Hopkins University Genetic Resource Core Facility).

### Quantitative real-time polymerase chain reaction (qRT-PCR)

Total RNA was isolated from cultured cells using the RNeasy mini kit (QIAGEN), and cDNAs were produced using QuantiTect reverse transcription kit (QIAGEN). qRT-PCR was performed using PowerUp SYBR Green Master Mix (ThermoFisher Scientific). Primer sequences were ATRX: forward 5'- CAATCACAGAAGCCGACAAG -3', reverse 5'- GTCATGAAGCTTCTGCACCA -3'; CDKN1A forward 5'- AGTCAGTTCCTTGTGGAGCC -3', reverse 5'- CATGGGTTCTGACGGACAT -3'; CDKN1B forward 5'- AAGAAGCCTGGCCTCAGAAG-3', reverse 5'-TTCATCAAGCAGTGATGTATCTGA-3'; CDKN2A forward 5'-GTTACGGTCGGAGGCCG -3', reverse 5'- GTGAGAGTGGCGGGGTC -3'; PARP1 forward 5'- GATGGGTTCTCTGAGCTTCG -3', reverse 5'- TCTGCCTTGCTACCAATTCC -3'; TERC forward 5'- CCCATTCATTTTGGCCGACTT -3', reverse 5'- GGCCGCTCCCTTTATAAAGC -3'; HPRT1 forward 5'-GTTATGGCGACCCGCAG-3', reverse 5'-ACCCTTTCCAAATCCTCAGC-3'. HPRT1 was used as the endogenous control. The relative fold changing was calculated based on the formula  $R=2^{-(\Delta Ct \text{ sample}- \Delta Ct \text{ control})}$ . Quantification qPCR assay for telomerase activity was performed according to the manufacturer's instructions (#8928, ScienCell).

#### Gene knockdown and knockout of ATRX or TERC

The CRISPR cas9 nickase system was used to generate inactivating mutations in either the *ATRX* or *TERC* genes, as previously reported (20,21). Guide RNAs (gRNAs) targeting TERC were obtained from Abmgood. Short hairpin RNA target human ATRX (sh11 and sh90), mouse ATRX (sh1 and sh3) and vector control pLKO.1 were obtained from Millipore Sigma. To produce lentiviruses, 293T cells were transfected with shRNA or gRNA plasmid and VSVG packaging plasmids mixture using lipofectamine 2000 (ThermoFisher Scientific). Lentiviral supernatants were collected at 48-72 h later and kept frozen at -80°C until needed. Cells infected with virus were selected with 1-2 µg/ml of puromycin (MilliporeSigma), 2-4 µg/ml of Blastidin (ThermoFisher Scientific) and 100-400 µg/ml of G418 (ThermoFisher Scientific) for 7 days to

generate stable cell lines. ATRX knockdown was confirmed by western blotting and *TERC* knockout (KO) was confirmed by qPCR.

### ALT validation

ALT was assessed with previously established methods (22-24). Ultra-bright telomeric foci were evaluated by telomere-specific FISH. Telomeric extra-chromosomal circles (e.g. C-circles) were detected using immunoblotting after a processive phi29 polymerase to amplify C-circle DNA. A DIG-conjugated probe containing the C-rich telomere repeat sequence specifically targeted the polymerase amplified signal. The known ALT-positive osteosarcoma cell line U2OS served as a positive control.

### Cell growth assessment

To assess effects on cell growth, the CellTiter-Blue assay was used (Promega). In brief, 1000 to 5000 cells were plated in triplicate in 96-well plates. 20-30 microliters of the CellTiter-Blue reagent was added per well in 96-well plates and incubated for 1-4 h at 37°C in 5% CO<sub>2</sub>. For drug treatments, cells in 96-well plates were cultured with various drug concentrations of AZD6244, AZD6738, VE-822, or temozolomide (Selleckchem). Vehicle (Dimethyl sulfoxide)-treated cells were used as controls and the cell survival fraction was calculated as percentage of control cells. Fluorescence (560 nmEx/590 nmEm) was measured using TECAN plate reader. Additionally, apoptosis assays were performed using Muse Annexin V & Dead Cell reagent (MilliporeSigma) and Bromodeoxyuridine (BrdU) incorporation assays were performed as previous described (25). Data were acquired using Muse flow cytometer (Millipore) and analyzed with FlowJo software.

### Western blotting

Cells were lysed in RIPA lysis buffer supplemented with protease inhibitors (MilliporeSigma). Primary antibodies used for western blots were: NF1 (A300-140A, 1:1000, Bethyl Laboratories), ATRX (#10321, 1:500, Cell Signaling Technology),  $\alpha$ -tubulin (#3873, 1:5000, Cell Signaling Technology),  $\beta$ -actin (sc-47778, 1:5000, Santa Cruz Biotechnology), pERK1/2 (#4370, 1:1000, Cell Signaling Technology), Erk1/2 (#9102, 1:1000, Cell Signaling Technology),  $\gamma$ H2AX (#9718, 1:1000, Cell Signaling Technology). Secondary antibodies used for western blots were anti-mouse IgG HRP-linked (#7076, 1:5000, Cell Signaling Technology) and anti-rabbit IgG HRP-linked (#7074, 1:5000, Cell Signaling Technology).

#### MPNST xenograft

For *in vivo* experiments,  $1 \times 10^6$  cells were sciatic nerve transplanted in Nude mice (Charles River). For bioluminescence imaging, cells were labelled with the lentiviral based reporter co-expressing RFP and luciferase (SBI). Animals were closely monitored for tumor growth, and euthanized when tumor size was over  $1000 \text{ mm}^3$

#### In vivo drug testing

For *in vivo* experiments,  $5 \times 10^5$  glioma cells were orthotopically transplanted (Stereotaxic coordinate: X(AP)=1.0 mm, Y(ML)=2.0 mm, Z(DV)=-3 mm) in Nude mice (Charles River). For bioluminescence imaging, cells were labelled with the lentiviral based reporter co-expressing RFP and luciferase (SBI). Oral drugs were delivered to xenografted mice once daily by gavage from d2 to d16. Animals were closely monitored for tumor growth, and euthanized when neurologic signs of disease develop. In addition, subsets were sacrificed at appropriate intervals and tissue sections microscopically examined for early evidence of tumor formation. Methods for the analysis of tumor xenograft for morphology, size, proliferation and differentiation are previously reported (26-28).

#### Statistical Analyses



For cell culture and functional assays, data were presented as mean  $\pm$  standard deviation with  $p < 0.05$  considered statistically significant. All experiments were performed in at least three biological replicates and data analyzed with a two-tailed Student's t-test or ANOVA as appropriate. Survival was assessed with Kaplan-Meier curves and statistical analyses made using standard software and statistical packages (GraphPad).

## Results

### ATRX loss in the context of diminished telomerase activity facilitates the development of ALT-associated hallmarks

To identify the biologic relevance of ATRX loss in NF1-associated gliomagenesis, we studied four previously characterized *Nf1*<sup>+/-</sup> *Trp53*<sup>+/-</sup> murine glioma lines (130G#3, 158D#8, 1491-9, 1861-10) representing all of the diffuse glioma grades, 2-4 (19). Compared to NIH-3T3 cells, these cell lines all underexpress *Nf1* while demonstrating variable *Atrx* expression, with *Atrx* loss in two cell lines, and preserved *Atrx* expression in two cell lines (**Supplementary Figure 1**).

Since ALT can develop in the presence of diminished telomerase activity (29), we tested the effects of *Atrx* knockdown (cell lines 130G#3 and 158D#8) in the presence of the telomerase inhibitor, BIBR1532. This inhibitor decreases telomerase activity by binding to the active site of TERT, thereby downregulating TERT expression (30,31). With the known caveat that murine telomere lengths are significantly longer and display stronger telomeric FISH signals compared to human cancer cells, we identified increased telomere FISH signal brightness, with features reminiscent of ALT, after prolonged *Atrx* knockdown (55 days) and concurrent *Tert* inhibition (39 days) (**Figure 1**).

### ATRX loss decreases cell growth in NF1-deficient human glioma lines, but with no effect in MPNST lines

Using the *Conditionally Reprogramming Culture* (CRC) technique (32), we previously developed a human pilocytic astrocytoma cell line derived from a patient with NF1 (17). *ATRX* depletion through shRNA resulted in decreased growth and increased apoptosis (**Figure 2**). Since *ATRX* loss and ALT activation are largely limited to high-grade neoplasms in the context of NF1 loss or inherited NF1 syndrome (10), we evaluated cell lines derived from high-grade neoplasms with *NF1* loss, including two sporadic glioblastoma cell lines with *NF1* inactivation (U251, SF188), a NF1-associated glioblastoma (JHH-NF1-GBM1), two MPNST cell lines (NF90.8, ST88-14) and a NF1-associated sarcoma line (JHH-CRC65). These cell lines displayed NF1 protein loss, preserved DAXX protein expression, but demonstrated variable *ATRX* protein levels. Notably, *ATRX* protein expression was higher in the sporadic glioma lines (U251, SF188), while completely absent in the NF1-associated glioblastoma line JHH-NF1-GBM1 (**Supplementary Figure 2**).

*ATRX* knockdown (via shRNA) or KO (via CRISPR) resulted in decreased growth in the high-grade glioma cell lines (U251, SF188), with increased apoptosis more evident in U251 *in vitro* (**Figure 3A-B**). Reduced growth of U251 after *ATRX* KO was also evident *in vivo* using orthotopic intracranial xenografts upon histological examination (**Supplementary Figure 3**), leading to a prolonged survival (**Figure 3C**). Functional loss of *ATRX* resulted in ALT in U251, but not in SF188 (18), and ALT features were present in the NF1-glioblastoma line JHH-NF1-GBM1 as demonstrated by the c-circle assay (**Supplementary Figure 4**) and telomere-specific FISH.

Next, we studied the effects of *ATRX* loss in NF1-deficient MPNST and sarcoma cell lines. In contrast to the NF1-deficient glioma lines, and despite successful *ATRX* knockdown, *ATRX* loss had no effect on growth *in vitro* (NF90.8, ST88-14, JHH-CRC65) or *in vivo* (NF90.8) (**Supplementary Figures 5-7**). Telomere-specific FISH staining of these cells showed rare

ultrabright, ALT-like foci (**Figure 4**). In contrast, *ATRX* knockdown resulted in decreased growth of a non-neoplastic Schwann cell line with increased levels of senescence marker p21 (CDKN1A) (**Supplementary Figure 8**).

#### ATRX deficiency sensitizes cells to ATR inhibitors and temozolomide

To test the feasibility of ATR inhibition in the treatment of high-grade neoplasms, we evaluated *NF1*- and *ATRX*-deficient cancer cells. The glioma cell line U251, which develops ALT after *ATRX* KO (18), was more sensitive to two different ATR inhibitors (AZD6738 and VE-822) in the absence of *ATRX*, in contrast to SF188 cell line which remains ALT-negative (**Figure 5**). In addition, *ATRX* KO also sensitized U251 to MEK inhibition (AZD6244) (**Figure 5**). Next, we tested the ATR inhibitor, AZD6738, in combination with temozolomide or MEK inhibition. The combination treatment of temozolomide and AZD6738 profoundly decreased growth in *ATRX*-deficient U251 cells (**Supplementary Figure 9**), while MEK inhibition (AZD6244) had no additional effect despite inhibiting MEK signaling as demonstrated by a decrease in pERK levels (**Supplementary Figure 10**). The *NF1*-associated glioblastoma cell line JHH-*NF1*-GBM1, which carries an *ATRX* mutation and exhibits ALT, grows under neurosphere conditions and intracranially as orthotopic xenografts, albeit slowly (**Figure 6A-B**). This cell line demonstrates sensitivity to ATR inhibition (AZD6738) *in vitro* while being resistant to temozolomide, a standard drug used in the treatment of high-grade glioma (**Figure 6C**). Similarly, *ATRX* knockdown and *TERC* KO in the MPNST cell line NF90.8 successfully suppressed telomerase activity (**Supplementary Figure 11**), and sensitized cells to ATR inhibition (AZD6738 and VE-822) (**Figure 7**). In contrast, *ATRX* knockdown in the ALT-negative, *NF1*-associated sarcoma line JHH-CRC65 did not increase sensitivity to either ATR inhibition or temozolomide treatment (**Supplementary Figure 12**).

Finally, we investigated the effect of ATR inhibition and temozolomide treatment on orthotopic glioma xenografts *in vivo*. Oral administration of the ATR inhibitor, AZD6738, decreased growth transiently in *ATRX*-deficient U251 xenografts, while the combination of temozolomide plus AZD6738 had a more pronounced and persistent inhibitory effect on tumor cell growth (**Figure 8**).

## Discussion

Inactivation of ATRX, or, less frequently, its associated protein DAXX, through deleterious mutations has been increasingly observed in subsets of cancers, and is consistently associated with ALT. There has been increasing interest in the biologic effect of ATRX, and particularly whether targeted therapies may be helpful for these tumors, which are often high-grade and difficult to treat. Functional loss of ATRX leads to G-quadruplex (G4) DNA secondary structures as a result of replication stress in glioma models (33). For example, *Atrx*-null neural progenitor cells are exquisitely sensitive to telomestatin, a compound that stabilizes G4 DNA secondary structures (34). Several groups have also reported on the efficacy of specific drugs for *ATRX*-mutant gliomas. In a mouse model developed using the *Sleeping Beauty* transposon system, Koschmann et al. demonstrated that *Atrx* deficiency leads to impaired non-homologous end joining, and sensitizes cells to compounds associated with the formation of double stranded DNA breaks (35). More recently, this group demonstrated that ATRX-deficient cells are associated with loss of Chk1 and reliant on ATM, thereby suggesting that ATM inhibition may sensitize these cells to radiation therapy (36). In addition, ATRX depletion in cells results in persistent association of telomeres with replication protein A, which in the presence of ATR inhibition, results in disruption of ALT and selective cell death (16). Several ATR inhibitors are in active phase I/II (37), including VX-970 and AZD6738, with AZD6738 having the added benefit of being orally bioavailable.

Despite the observation that ATRX-deficient tumors essentially always develop ALT, this is not consistently observed in model systems, suggesting that in certain cellular contexts, ATRX loss is not sufficient to induce ALT (18,21,38). Our experience demonstrates that attenuated telomerase activity (i.e. telomerase inhibition) is necessary, which may require prolonged or permanent TERT inactivation, and our data suggests this phenomenon to be cell-type dependent. The focus of our study is on functional loss of ATRX, since it is the predominant gene inactivated by mutations in solid tumors associated with ALT, particularly tumors arising from the central and peripheral nervous systems. It seems that indeed, ALT-positive cells may require the presence of specific DNA repair proteins, but the precise requirements vary by cell type (39).

In summary, ATRX loss and the development of ALT in NF1-deficient tumors represents a potential therapeutic vulnerability to ATR inhibition that may lead to much needed targeted treatments for solid tumors developing in patients with NF1 or in the sporadic setting. However, this vulnerability may be cancer type and/or cell line dependent, and therefore further studies are needed to identify the best biomarkers and/or drugs that will help manage this patient population.

## **Acknowledgments**

This work was supported in part by DOD W81XWH-18-1-0496 (FJR, CH, AM), Pilocytic/Pilomyxoid Fund, including Lauren's First and Goal, and the Stick it to Brain Tumors Annual Women's Ice Hockey Tournament (F.J.R, CGE.) and NIH grant P30 CA006973 to the Sidney Kimmel Comprehensive Cancer Center (PI: W. Nelson).

## References

1. Brems H, Beert E, de Ravel T, Legius E. Mechanisms in the pathogenesis of malignant tumours in neurofibromatosis type 1. *Lancet Oncol* **2009**;10(5):508-15 doi 10.1016/S1470-2045(09)70033-6.
2. Rodriguez FJ, Perry A, Gutmann DH, O'Neill BP, Leonard J, Bryant S, *et al.* Gliomas in neurofibromatosis type 1: a clinicopathologic study of 100 patients. *J Neuropathol Exp Neurol* **2008**;67(3):240-9 doi 10.1097/NEN.0b013e318165eb75.
3. Brat DJ, Verhaak RG, Aldape KD, Yung WK, Salama SR, Cooper LA, *et al.* Comprehensive, Integrative Genomic Analysis of Diffuse Lower-Grade Gliomas. *N Engl J Med* **2015**;372(26):2481-98 doi 10.1056/NEJMoa1402121.
4. D'Angelo F, Ceccarelli M, Tala, Garofano L, Zhang J, Frattini V, *et al.* The molecular landscape of glioma in patients with Neurofibromatosis 1. *Nat Med* **2019**;25(1):176-87 doi 10.1038/s41591-018-0263-8.
5. Killela PJ, Reitman ZJ, Jiao Y, Bettegowda C, Agrawal N, Diaz LA, Jr., *et al.* TERT promoter mutations occur frequently in gliomas and a subset of tumors derived from cells with low rates of self-renewal. *Proc Natl Acad Sci U S A* **2013**;110(15):6021-6 doi 10.1073/pnas.1303607110.
6. Barthel FP, Wei W, Tang M, Martinez-Ledesma E, Hu X, Amin SB, *et al.* Systematic analysis of telomere length and somatic alterations in 31 cancer types. *Nat Genet* **2017**;49(3):349-57 doi 10.1038/ng.3781.
7. Heaphy CM, Subhawong AP, Hong SM, Goggins MG, Montgomery EA, Gabrielson E, *et al.* Prevalence of the alternative lengthening of telomeres telomere maintenance mechanism in human cancer subtypes. *Am J Pathol* **2011**;179(4):1608-15 doi 10.1016/j.ajpath.2011.06.018.
8. Simpson K, Jones RE, Grimstead JW, Hills R, Pepper C, Baird DM. Telomere fusion threshold identifies a poor prognostic subset of breast cancer patients. *Mol Oncol* **2015**;9(6):1186-93 doi 10.1016/j.molonc.2015.02.003.
9. Heaphy CM, Yoon GS, Peskoe SB, Joshu CE, Lee TK, Giovannucci E, *et al.* Prostate cancer cell telomere length variability and stromal cell telomere length as prognostic markers for metastasis and death. *Cancer Discov* **2013**;3(10):1130-41 doi 10.1158/2159-8290.CD-13-0135.
10. Rodriguez FJ, Graham MK, Brosnan-Cashman JA, Barber JR, Davis C, Vizcaino MA, *et al.* Telomere alterations in neurofibromatosis type 1-associated solid tumors. *Acta Neuropathol Commun* **2019**;7(1):139 doi 10.1186/s40478-019-0792-5.
11. Heaphy CM, de Wilde RF, Jiao Y, Klein AP, Edil BH, Shi C, *et al.* Altered telomeres in tumors with ATRX and DAXX mutations. *Science* **2011**;333(6041):425 doi 10.1126/science.1207313.
12. Reinhardt A, Stichel D, Schrimpf D, Sahm F, Korshunov A, Reuss DE, *et al.* Anaplastic astrocytoma with piloid features, a novel molecular class of IDH wildtype glioma with recurrent MAPK pathway, CDKN2A/B and ATRX alterations. *Acta Neuropathol* **2018**;136(2):273-91 doi 10.1007/s00401-018-1837-8.
13. Rodriguez FJ, Brosnan-Cashman JA, Allen SJ, Vizcaino MA, Giannini C, Camelo-Piragua S, *et al.* Alternative lengthening of telomeres, ATRX loss and H3-K27M mutations in histologically defined pilocytic astrocytoma with anaplasia. *Brain Pathol* **2019**;29(1):126-40 doi 10.1111/bpa.12646.
14. George SL, Lorenzi F, King D, Hartlieb S, Campbell J, Pemberton H, *et al.* Therapeutic vulnerabilities in the DNA damage response for the treatment of ATRX mutant neuroblastoma. *EBioMedicine* **2020**;59:102971 doi 10.1016/j.ebiom.2020.102971.
15. Garbarino J, Eckroate J, Sundaram RK, Jensen RB, Bindra RS. Loss of ATRX confers DNA repair defects and PARP inhibitor sensitivity. *Transl Oncol* **2021**;14(9):101147 doi 10.1016/j.tranon.2021.101147.

16. Flynn RL, Cox KE, Jeitany M, Wakimoto H, Bryll AR, Ganem NJ, *et al.* Alternative lengthening of telomeres renders cancer cells hypersensitive to ATR inhibitors. *Science* **2015**;347(6219):273-7 doi 10.1126/science.1257216.
17. Yuan M, White D, Resar L, Bar E, Groves M, Cohen A, *et al.* Conditional reprogramming culture conditions facilitate growth of lower-grade glioma models. *Neuro Oncol* **2021**;23(5):770-82 doi 10.1093/neuonc/noaa263.
18. Brosnan-Cashman JA, Yuan M, Graham MK, Rizzo AJ, Myers KM, Davis C, *et al.* ATRX loss induces multiple hallmarks of the alternative lengthening of telomeres (ALT) phenotype in human glioma cell lines in a cell line-specific manner. *PLoS One* **2018**;13(9):e0204159 doi 10.1371/journal.pone.0204159.
19. Gursel DB, Connell-Albert YS, Tuskan RG, Anastassiadis T, Walrath JC, Hawes JJ, *et al.* Control of proliferation in astrocytoma cells by the receptor tyrosine kinase/PI3K/AKT signaling axis and the use of PI-103 and TCN as potential anti-astrocytoma therapies. *Neuro Oncol* **2011**;13(6):610-21 doi 10.1093/neuonc/nor035.
20. Shen B, Zhang W, Zhang J, Zhou J, Wang J, Chen L, *et al.* Efficient genome modification by CRISPR-Cas9 nickase with minimal off-target effects. *Nat Methods* **2014**;11(4):399-402 doi 10.1038/nmeth.2857.
21. Napier CE, Huschtscha LI, Harvey A, Bower K, Noble JR, Hendrickson EA, *et al.* ATRX represses alternative lengthening of telomeres. *Oncotarget* **2015**;6(18):16543-58 doi 10.18632/oncotarget.3846.
22. Meeker AK, Gage WR, Hicks JL, Simon I, Coffman JR, Platz EA, *et al.* Telomere length assessment in human archival tissues: combined telomere fluorescence in situ hybridization and immunostaining. *Am J Pathol* **2002**;160(4):1259-68.
23. Lovejoy CA, Li W, Reisenweber S, Thongthip S, Bruno J, de Lange T, *et al.* Loss of ATRX, genome instability, and an altered DNA damage response are hallmarks of the alternative lengthening of telomeres pathway. *PLoS genetics* **2012**;8(7):e1002772 doi 10.1371/journal.pgen.1002772.
24. Henson JD, Cao Y, Huschtscha LI, Chang AC, Au AY, Pickett HA, *et al.* DNA C-circles are specific and quantifiable markers of alternative-lengthening-of-telomeres activity. *Nat Biotechnol* **2009**;27(12):1181-5 doi 10.1038/nbt.1587.
25. Nix JS, Yuan M, Imada EL, Ames H, Marchionni L, Gutmann DH, *et al.* Global microRNA profiling identified miR-10b-5p as a regulator of neurofibromatosis 1 (NF1)-glioma migration. *Neuropathol Appl Neurobiol* **2021**;47(1):96-107 doi 10.1111/nan.12641.
26. Bar EE, Lin A, Mahairaki V, Matsui W, Eberhart CG. Hypoxia increases the expression of stem-cell markers and promotes clonogenicity in glioblastoma neurospheres. *Am J Pathol* **2010**;177(3):1491-502 doi 10.2353/ajpath.2010.091021.
27. Fan X, Khaki L, Zhu TS, Soules ME, Talsma CE, Gul N, *et al.* NOTCH pathway blockade depletes CD133-positive glioblastoma cells and inhibits growth of tumor neurospheres and xenografts. *Stem Cells* **2010**;28(1):5-16 doi 10.1002/stem.254.
28. Sun P, Xia S, Lal B, Eberhart CG, Quinones-Hinojosa A, Maciaczyk J, *et al.* DNER, an epigenetically modulated gene, regulates glioblastoma-derived neurosphere cell differentiation and tumor propagation. *Stem Cells* **2009**;27(7):1473-86 doi 10.1002/stem.89.
29. Hu Y, Shi G, Zhang L, Li F, Jiang Y, Jiang S, *et al.* Switch telomerase to ALT mechanism by inducing telomeric DNA damages and dysfunction of ATRX and DAXX. *Sci Rep* **2016**;6:32280 doi 10.1038/srep32280.
30. Kong W, Lv N, Wysham WZ, Roque DR, Zhang T, Jiao S, *et al.* Knockdown of hTERT and Treatment with BIBR1532 Inhibit Cell Proliferation and Invasion in Endometrial Cancer Cells. *J Cancer* **2015**;6(12):1337-45 doi 10.7150/jca.13054.

31. Saraswati AP, Relitti N, Brindisi M, Gemma S, Zisterer D, Butini S, *et al.* Raising the bar in anticancer therapy: recent advances in, and perspectives on, telomerase inhibitors. *Drug Discov Today* **2019**;24(7):1370-88 doi 10.1016/j.drudis.2019.05.015.
32. Liu X, Ory V, Chapman S, Yuan H, Albanese C, Kallakury B, *et al.* ROCK inhibitor and feeder cells induce the conditional reprogramming of epithelial cells. *Am J Pathol* **2012**;180(2):599-607 doi 10.1016/j.ajpath.2011.10.036.
33. Wang Y, Yang J, Wild AT, Wu WH, Shah R, Danussi C, *et al.* G-quadruplex DNA drives genomic instability and represents a targetable molecular abnormality in ATRX-deficient malignant glioma. *Nat Commun* **2019**;10(1):943 doi 10.1038/s41467-019-08905-8.
34. Watson LA, Solomon LA, Li JR, Jiang Y, Edwards M, Shin-ya K, *et al.* Atrx deficiency induces telomere dysfunction, endocrine defects, and reduced life span. *J Clin Invest* **2013**;123(5):2049-63 doi 10.1172/JCI65634.
35. Koschmann C, Calinescu AA, Nunez FJ, Mackay A, Fazal-Salom J, Thomas D, *et al.* ATRX loss promotes tumor growth and impairs nonhomologous end joining DNA repair in glioma. *Sci Transl Med* **2016**;8(328):328ra28 doi 10.1126/scitranslmed.aac8228.
36. Qin T, Mullan B, Ravindran R, Messinger D, Siada R, Cummings JR, *et al.* ATRX loss in glioma results in dysregulation of cell-cycle phase transition and ATM inhibitor radio-sensitization. *Cell Rep* **2022**;38(2):110216 doi 10.1016/j.celrep.2021.110216.
37. Karnitz LM, Zou L. Molecular Pathways: Targeting ATR in Cancer Therapy. *Clin Cancer Res* **2015**;21(21):4780-5 doi 10.1158/1078-0432.CCR-15-0479.
38. Graham MK, Kim J, Da J, Brosnan-Cashman JA, Rizzo A, Baena Del Valle JA, *et al.* Functional Loss of ATRX and TERC Activates Alternative Lengthening of Telomeres (ALT) in LAPC4 Prostate Cancer Cells. *Mol Cancer Res* **2019**;17(12):2480-91 doi 10.1158/1541-7786.MCR-19-0654.
39. Martinez AR, Kaul Z, Parvin JD, Groden J. Differential requirements for DNA repair proteins in immortalized cell lines using alternative lengthening of telomere mechanisms. *Genes Chromosomes Cancer* **2017**;56(8):617-31 doi 10.1002/gcc.22465.

## Figure Legends

**Figure 1. Telomere-specific FISH staining in *Nf1<sup>-/-</sup>Tp53<sup>-/-</sup>* murine glioma cell line 130G#3.** Development of ultrabright telomere foci, indicative of ALT, after *Atrx* knockdown and treatment with the telomerase inhibitor, BIBR1532 for 39 days.

**Figure 2. ATRX knockdown in the human glioma cell line JHH-NF1-PA1.** NF1 pediatric pilocytic astrocytoma cell line JHH-NF1-PA1 has pronounced NF1 loss in culture (A). Successful *ATRX* knockdown (mRNA left, protein right) using shRNA hairpins (B). *ATRX* loss leads to decreased growth of JHH-NF1-PA1 (C), primarily through increased apoptosis (D).

**Figure 3. ATRX knockout in NF1-deficient glioblastoma cell lines U251 and SF188.** Decreased cell growth, secondary to apoptosis, was noted *in vitro* (A). Successful *ATRX* knockout in both glioma lines at the protein level (B). *ATRX* knockout in U251 resulted in decreased tumor growth in orthotopic nude mouse xenografts (C).

**Figure 4. ATRX knockdown resulted in rare abnormal telomere FISH signals.** Rare ultrabright telomeric foci were detected in the MPNST cell lines ST88-14 and NF90.8 after *ATRX* knockdown.

**Figure 5. ALT-positive, ATRX-deficient U251 cells display an increased sensitivity to ATR inhibition.** U251 and SF188 cells were treated with various doses of AZD6244, VE-822 or AZD6738 for 5 days, cell survival were normalized with vehicle control. AZD6738 and VE-822



decreased growth of U251 (top row), but not in cell line SF188 (ALT-) (bottom row). MEK inhibition (AZD6244, selumetinib) had a modest effect on growth in U251 as well.

**Figure 6. ATR inhibition impairs growth of the NF1-patient derived glioblastoma cell line JHH-NF1-GBM1 *in vitro*.** JHH-NF1-GBM1 grown under neurosphere culture condition (A) and in orthotopic nude mouse xenografts (B). Decreased cell growth after treatment with the ATR inhibitor, AZD6738, was noted *in vitro*, although these cells remained relatively resistant to treatment with temozolomide.

**Figure 7. ATRX and TERC loss impairs growth of the MPNST cell line NF90-8 when treated with ATR inhibitors.** MPNST cell clones with concurrent ATRX knockdown and TERC knockout are sensitive to ATR inhibitors AZD6738 and VE-822, but not to MEK inhibitor (AZD6244) or temozolomide.

**Figure 8. ATR inhibition transiently impairs growth in the NF1 glioma cell line U251 with ATRX loss.** Orthotopic xenografts using the glioma cell line U251 demonstrate transient growth inhibition after treatment with the ATR inhibitor, AZD6738. Growth inhibition is more persistent when combined with temozolomide.

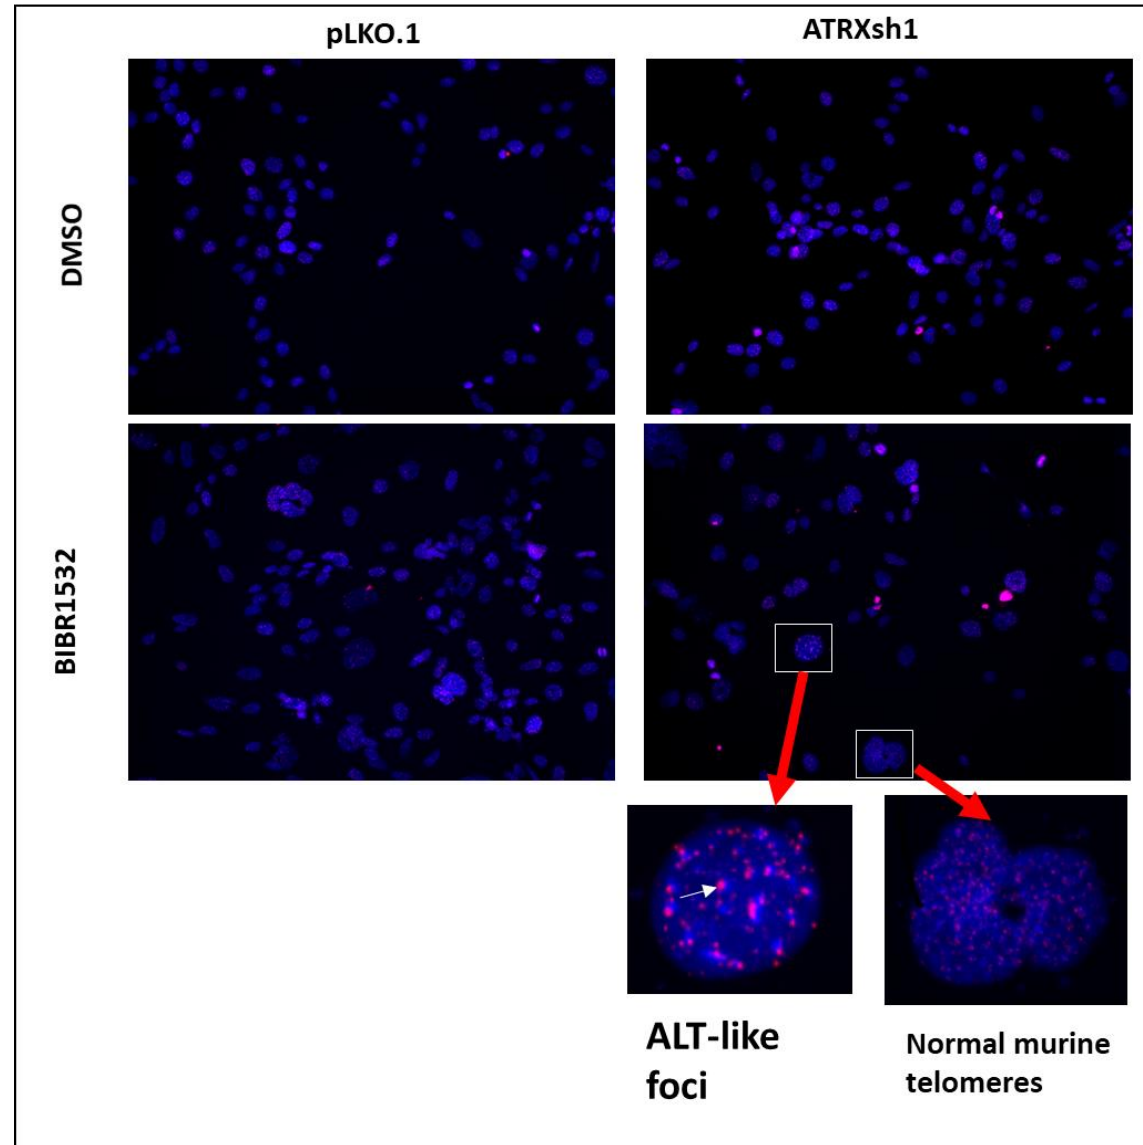

**A**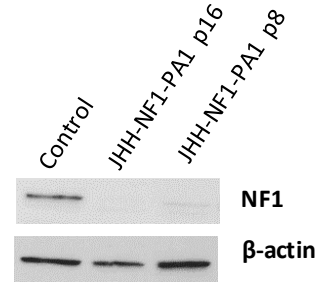**B**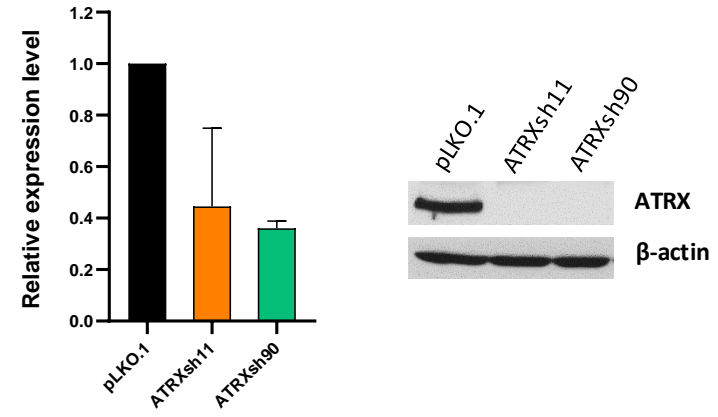**C**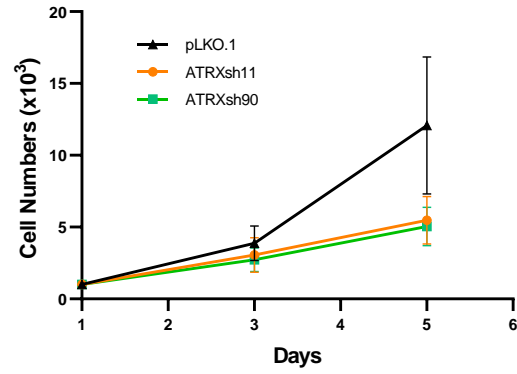**D**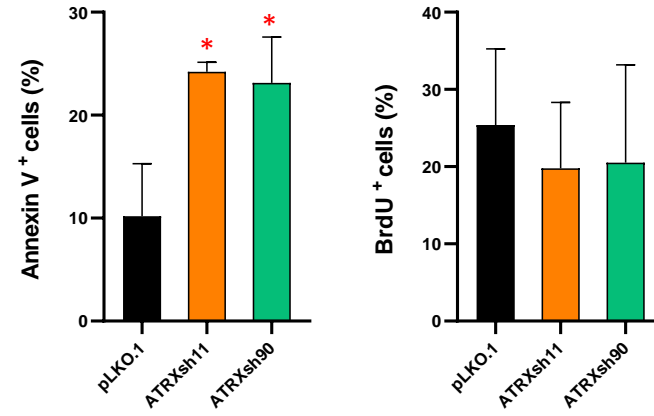

**A**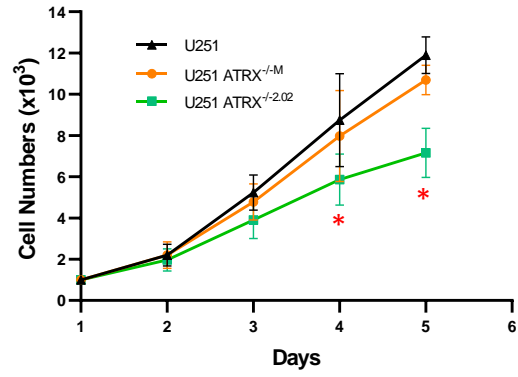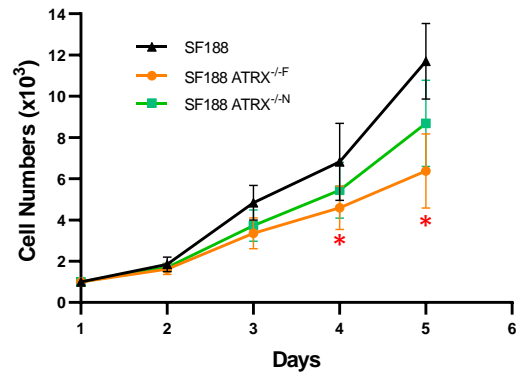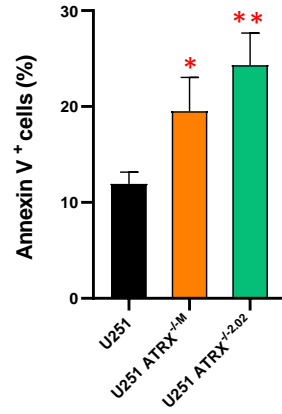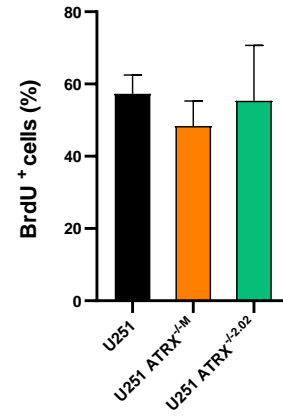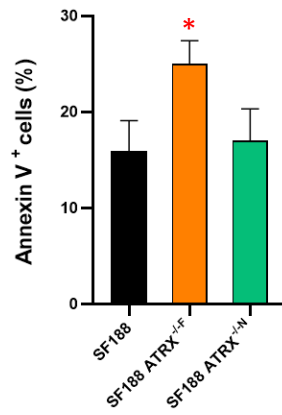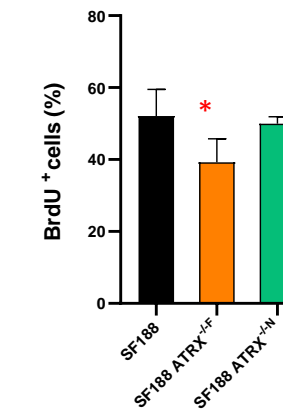**B**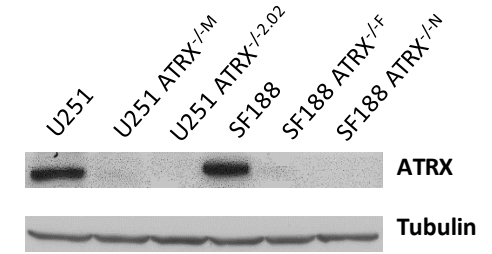**C**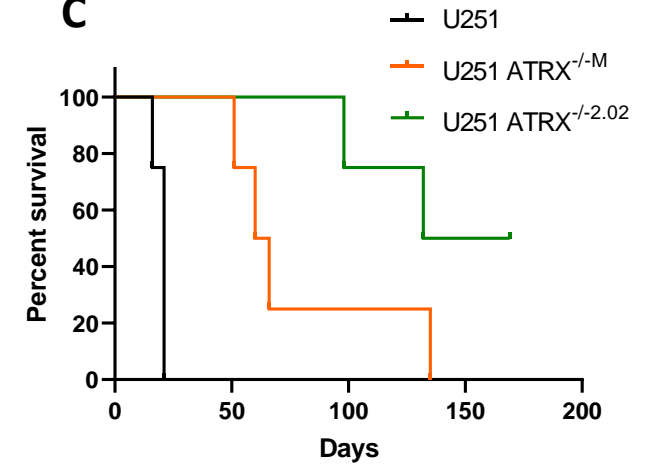

ST88-14 ATRXsh90

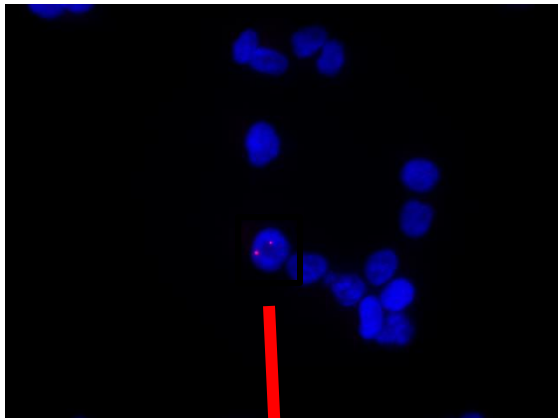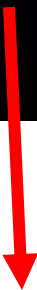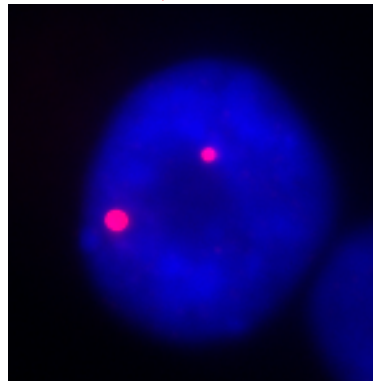

NF90-8 ATRXsh90

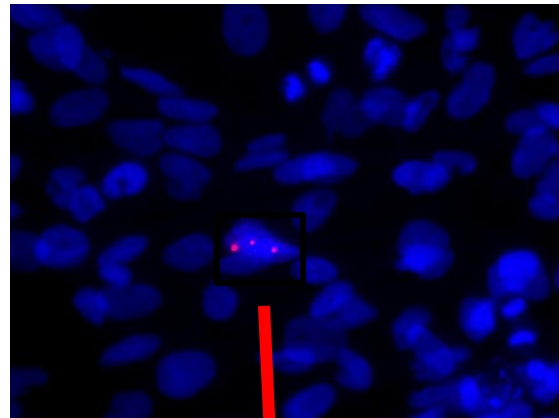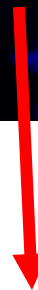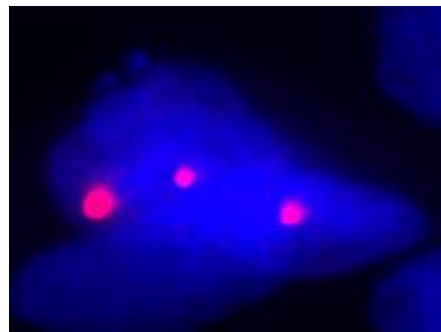

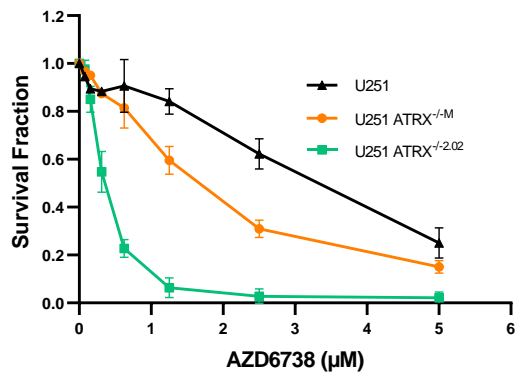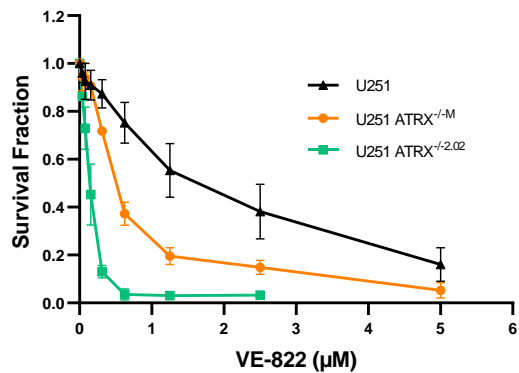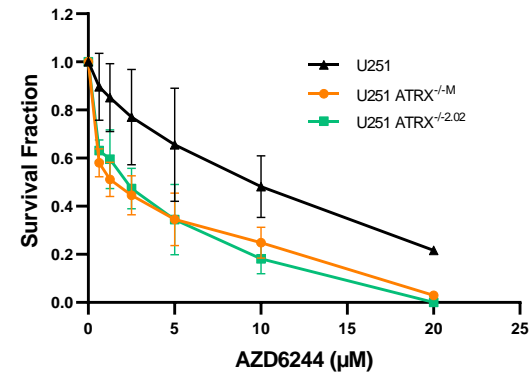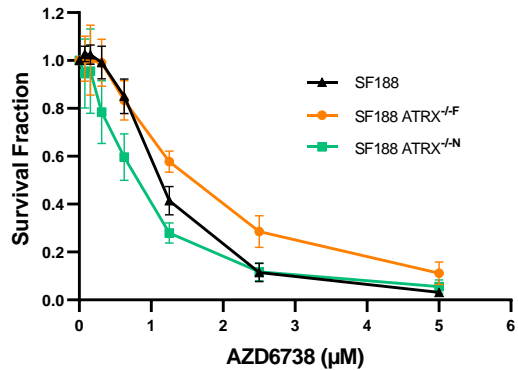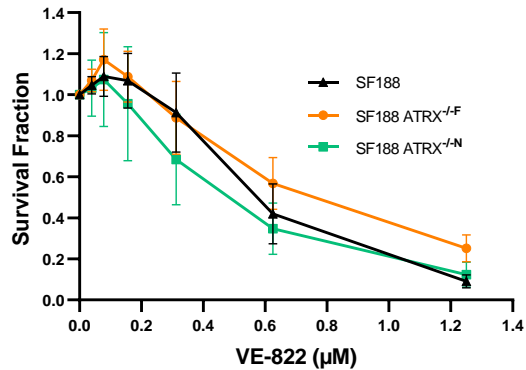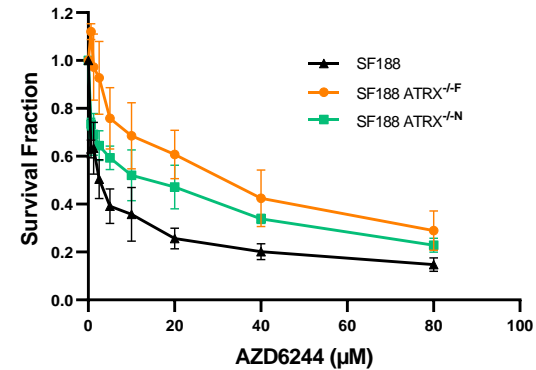

**AZD6738: ATR inhibitor**

**VE-822: ATR inhibitor**

**AZD6244: MEK inhibitor**

# JHH-NF1-GBM1

A

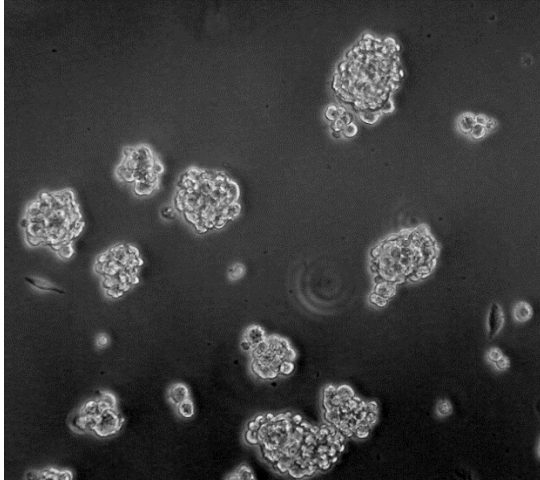

B

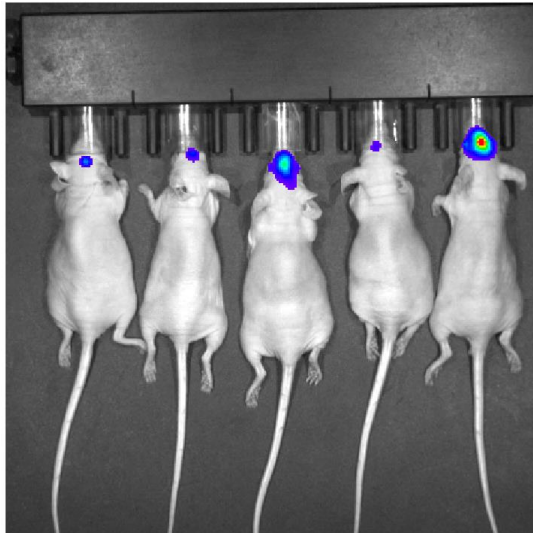

C

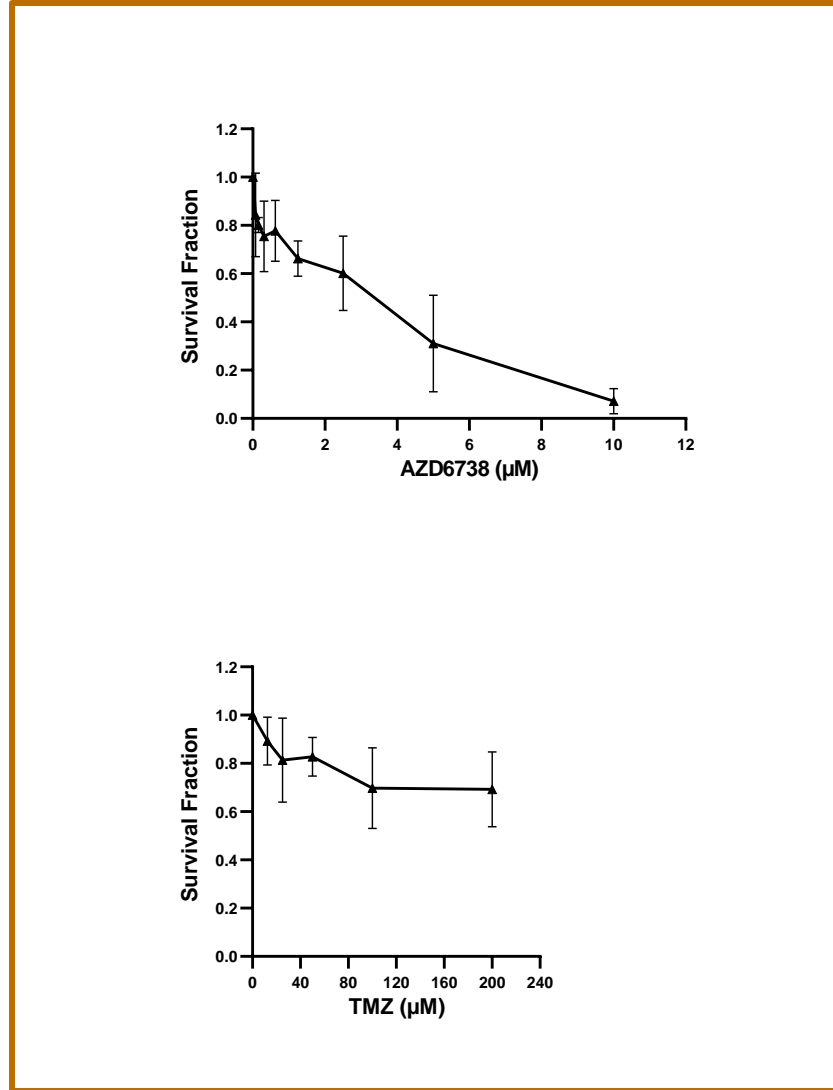

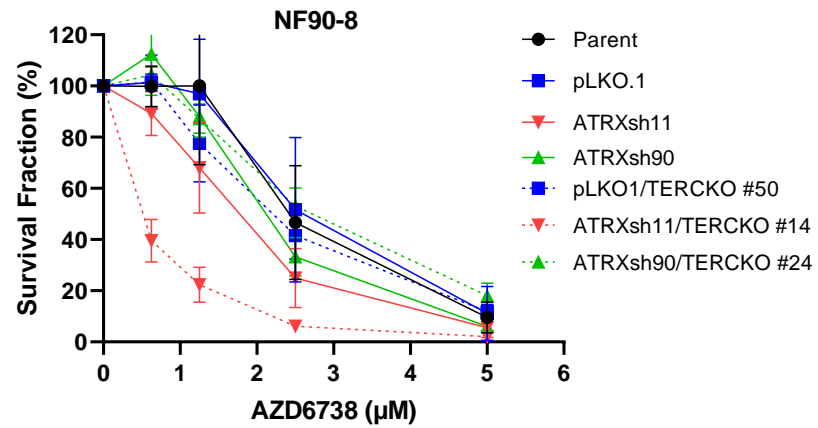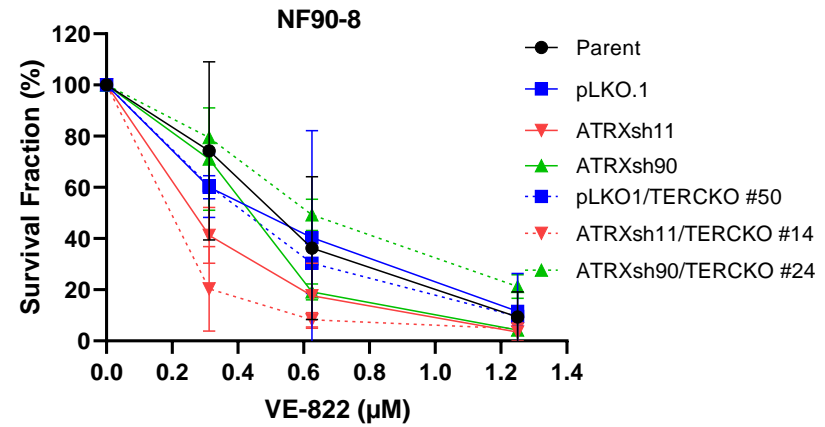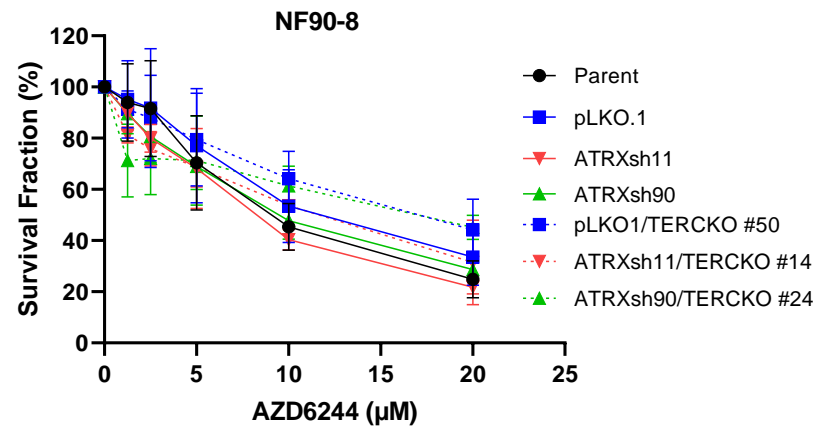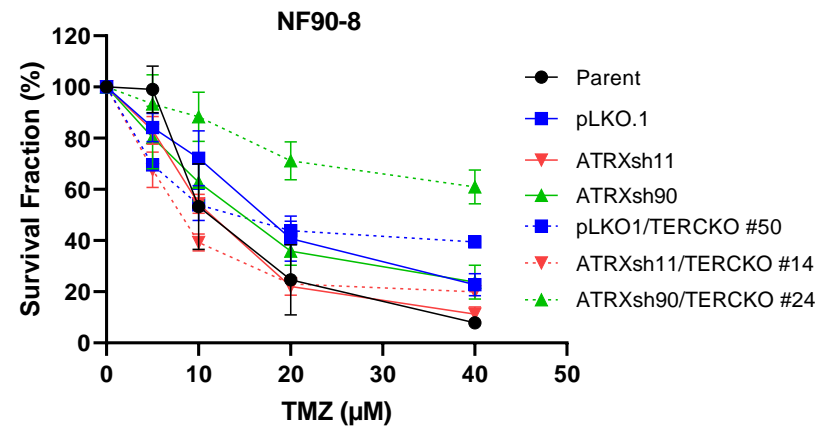



### AZD6738 25mg/kg

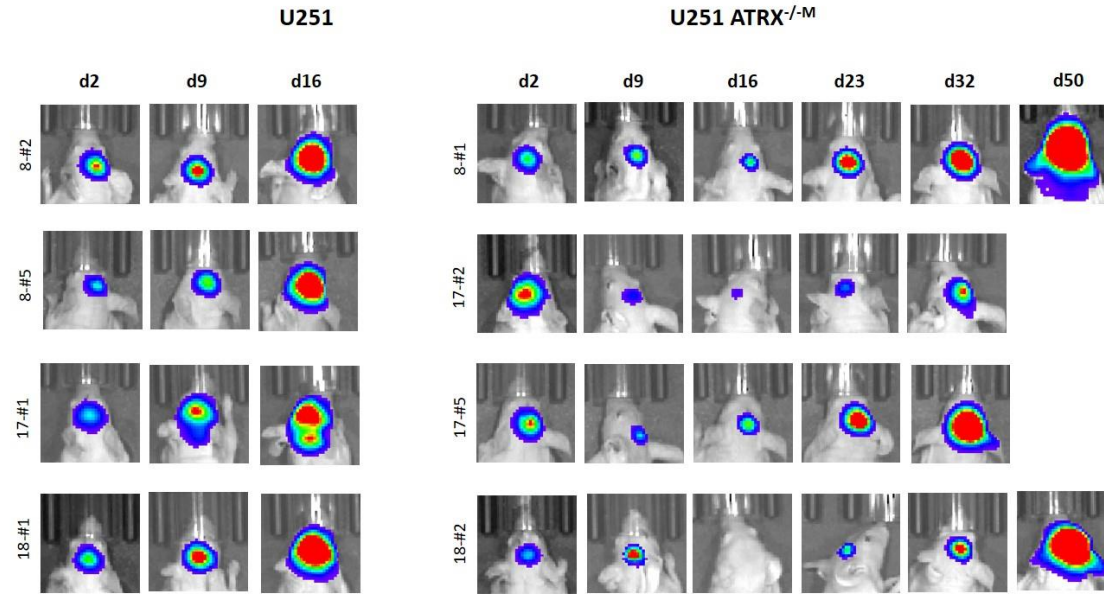

### AZD6738 25mg/kg + TMZ 10mg/kg

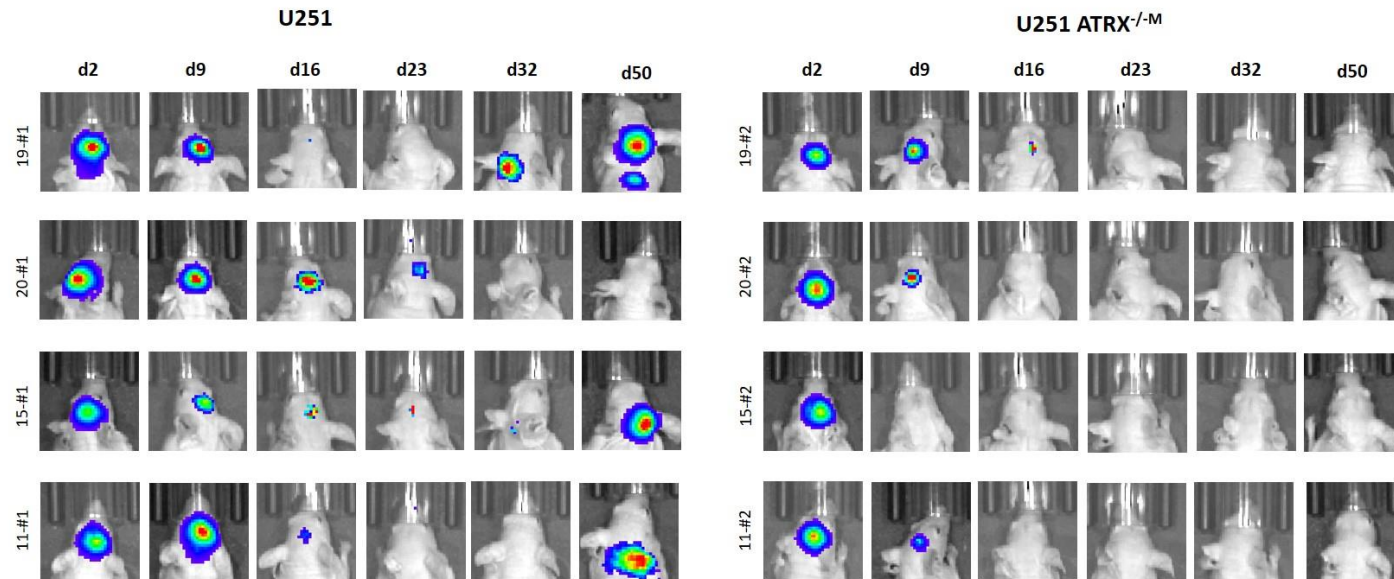

Source: https://www.biorxiv.org/content/biorxiv/early/2022/02/03/2022.02.03.479021.full.pdf
